# Supplementary material for: Tumor-Promoting Desmoplasia Is Disrupted by Depleting FAP-Expressing Stromal Cells
Source: Oxford University Press journal article supplement (doi:10.1158/0008-5472.can-14-3041), 2015-05-15
Supplement: 00085472can143041-sup-139434_3_supp_2968825_nnyhn4.docx [file 00085472can143041-sup-139434_3_supp_2968825_nnyhn4.docx]

**Supplementary Table 1. Reagents for immunohistochemistry studies**

| **Antibody** | **Supplier** | **Catalog** | **Dilution** |
| --- | --- | --- | --- |
| **Primary** |  |  |  |
| Ki67 | Abcam | ab15580 | 1:450 |
| Ki67 | DAKO | M7249 | 1:200 |
| Ki67 (human specific) | DAKO | F7268 | 1:350 |
| Cleaved Caspase-s3 | Cell Signaling | 9664 | 1:100 |
| FAP | R&D Systems | BAF3715 | 1:40 |
| SMA | Abcam | ab5694 | 1:400 |
| CD31 | Abcam | ab28364 | 1:100 |
| NG2 | R&D Systems | MAB6689 | 1:50 |
| Fibronectin | Sigma | F3648 | 1:1200 |
| Versican | EMD Millipore | AB1033 | 1:60 |
| Biotinylated-HABP | EMD Millipore | 385911 | 1:250 |
|  |  |  |  |
| **Secondary** |  |  |  |
| biotin-goat  rabbit IgG | Vector Labs | BA 1000 | 1:1500 |
| biotin-goat  mouse IgG | Vector Labs | BA 9200 | 1:1500 |
| biotin-goat  rat IgG | Jackson | 112-065-003 | 1:1000 |
|  |  |  |  |
|  |  |  |  |
| **Tertiary** |  |  |  |
| Streptavidin-HRP | Jackson | 016-030-084 | 1:1000 |
| Avidin-biotin-complex | Vector Labs | PK-6100 | 1:50 |
|  |  |  |  |
|  |  |  |  |
